# Supplementary material
Source: PubMed Central journal article supplement (PMC2622432)

## SUPPORTING INFORMATION

### **S-Alkylated Homocysteine Derivatives: New Inhibitors of Human Betaine-Homocysteine**

#### **S-Methyltransferase**

Jiří Jiráček\*<sup>1</sup>, Michaela Collinsová<sup>1</sup>, Ivan Rosenberg\*<sup>1</sup>, Miloš Buděšínský<sup>1</sup>, Eva Protivínská<sup>1</sup>, Hana Netušilová<sup>1</sup>, Timothy A. Garrow<sup>2</sup>

<sup>1</sup>Institute of Organic Chemistry and Biochemistry, Academy of Sciences of the Czech Republic, Flemingovo nám. 2, 166 10 Prague 6, Czech Republic

<sup>2</sup>Department of Food Science and Human Nutrition, University of Illinois, Urbana, Illinois 61801, USA

\*Corresponding authors. Tel +420220183441, fax +420220183571, e-mails jiracek@uochb.cas.cz, ivan@uochb.cas.cz.

#### **Contents:**

1. HPLC purity data for target compounds.
2. <sup>1</sup>H and <sup>13</sup>C NMR spectra records for target compounds **2**, **9** and **19**.

**1. HPLC purity data for target compounds.** HPLC analyses for target compounds were measured using two different HPLC systems.

Analytical **RP-HPLC** was performed using a Watrex (Nucleosil 120, 5 $\mu$ m, C18, 25 x 0.46 cm; Prague, Czech Republic) column. For gradient RP-HPLC analysis, a Waters LC 625 System (Milford, MA, USA) was used. Different gradients of acetonitrile (% v/v) in water containing 0.1% (v/v) of TFA at 1 ml/min were used for elution of compounds: a) 0 min - 0 %; 5 min - 0 %; 25 min - 16 %; 35 min - 80 %; 36 min - 0%; b) 0 min - 2 %; 5 min - 2 %; 25 min - 18 %; 35 min - 80 %; 36 min - 2%; c) 0 min - 4 %; 5 min - 4 %; 25 min - 22 %; 35 min - 80 %; 36 min - 4 %; d) 0 min - 4 %; 5 min - 4 %; 25 min - 28 %; 35 min - 80 %; 36 min - 4%. The purity data resulted from integration of peaks at 218 nm and are summarized in Table 1.

Analytical **Ion-exchange chromatography** was performed at 0.25 ml/min using AS11-HC (0.2 x 25 cm, Dionex Corporation, Sunnyvale, CA) column and using BioLC system (GP50 gradient pump, ED50 electrochemical detector) from Dionex Corporation (Sunnyvale, CA). The following gradient of water (A), 0.25 M sodium hydroxide (B), 1 M sodium acetate (C) and 0.1 M acetic acid (D) was used for elution of compounds: 0 min - 76% A, 24% B; 2 min - 76% A, 24% B; 8 min - 64% A, 36% B; 11 min - 64% A, 36% B; 18 min - 40% A, 20% B, 40% C; 21 min - 44% A, 16% B, 40% C; 23 min - 14% A, 16% B, 70% C; 45 min - 4% A, 16% B, 70% C; 45.1 min - 100% D; 47.1 min - 100% D; 47.2 min - 20% A, 80% B; 49.2 min - 20% A, 80% B; 49.3 min - 76% A, 24% B; 74 min - 76% A, 24% B. The purity data resulted from integration of peaks after amperometric detection and are given in Table 1. na means that the data are not available due to the low amperometric signal.

Table 1. HPLC purity data for target compounds. <sup>a-b</sup>Different gradients of acetonitrile in water.

| Compound  | RP-HPLC              |            | Ion-exchange HPLC    |            |
|-----------|----------------------|------------|----------------------|------------|
|           | E <sub>t</sub> (min) | Purity (%) | E <sub>t</sub> (min) | Purity (%) |
| <b>2</b>  | 23.05 <sup>b</sup>   | 99.0       | 39.62                | 98.1       |
| <b>8</b>  | 15.03 <sup>b</sup>   | 97.4       | 36.83                | 95.8       |
| <b>9</b>  | 26.99 <sup>b</sup>   | 99.1       | 46.08                | 99.1       |
| <b>10</b> | 11.82 <sup>a</sup>   | 95.8       | 30.47                | 95.3       |
| <b>11</b> | 9.55 <sup>a</sup>    | 96.9       | 34.45                | 98.2       |
| <b>12</b> | 21.63 <sup>b</sup>   | 98.7       | 33.75                | 98.5       |

|           |                    |      |       |      |
|-----------|--------------------|------|-------|------|
| <b>13</b> | 29.74 <sup>b</sup> | 99.3 | na    | na   |
| <b>14</b> | 23.96 <sup>d</sup> | 97.5 | na    | na   |
| <b>15</b> | 24.13 <sup>c</sup> | 95.8 | na    | na   |
| <b>16</b> | 31.69 <sup>b</sup> | 99.6 | na    | na   |
| <b>17</b> | 25.32 <sup>d</sup> | 99.5 | 32.01 | 99.9 |
| <b>18</b> | 19.01 <sup>b</sup> | 95.2 | 33.59 | 98.8 |
| <b>19</b> | 16.09 <sup>b</sup> | 97.6 | 47.29 | 97.9 |
| <b>20</b> | 14.51 <sup>b</sup> | 97.9 | 41.23 | 98.3 |
| <b>21</b> | 18.53 <sup>b</sup> | 97.3 | 32.90 | 96.2 |
| <b>22</b> | 17.65 <sup>a</sup> | 99.4 | 33.91 | 99.8 |
| <b>23</b> | 5.94 <sup>a</sup>  | 99.6 | 33.04 | 96.7 |
| <b>24</b> | 4.82 <sup>a</sup>  | 96.1 | 33.54 | 97.9 |
| <b>25</b> | 14.63 <sup>a</sup> | 95.1 | 33.74 | 95.6 |

**3. <sup>1</sup>H and <sup>13</sup>C NMR spectra records for target compounds 2, 9 and 19.**

4.

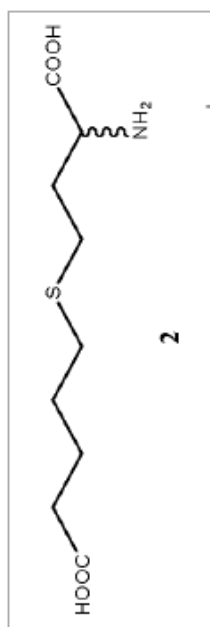

JIRACEK, JJ-3  
1H-NMR: in DMSO  
15.02.2006 BU

Current Data Parameters  
NAME: JIRACEK\_JJ-3  
PROCNO: 1

F2-Acquisition Parameters  
Date\_: 20060215  
Time: 12.20  
INSTRUM: spect  
PROBHD: 5 mm Txi 1H-13  
PULPROG: zg30  
TD: 75072  
SOLVENT: DMSO  
DS: 2  
SS: 0  
SWH: 8012.820-Hz  
FIDRES: 0.105735-Hz  
AQ: 4.6544051-sec  
RG: 14.3  
AQ: 6.401-usec  
CF: 6.00-usec  
TE: 300.015-K  
D1: 1.00000000-sec  
TD0: 1

===== CHANNEL f1 =====  
NUC1: 1H  
P1: 9.20-usec  
PL1: 1.00-dB  
SFO1: 500.1337510-MHz

F2-Processing parameters  
SI: 1310.72  
SF: 500.1300654-MHz  
WDW: 0  
SSB: 0.00-Hz  
LB: 0  
GB: 0  
PC: 0.20

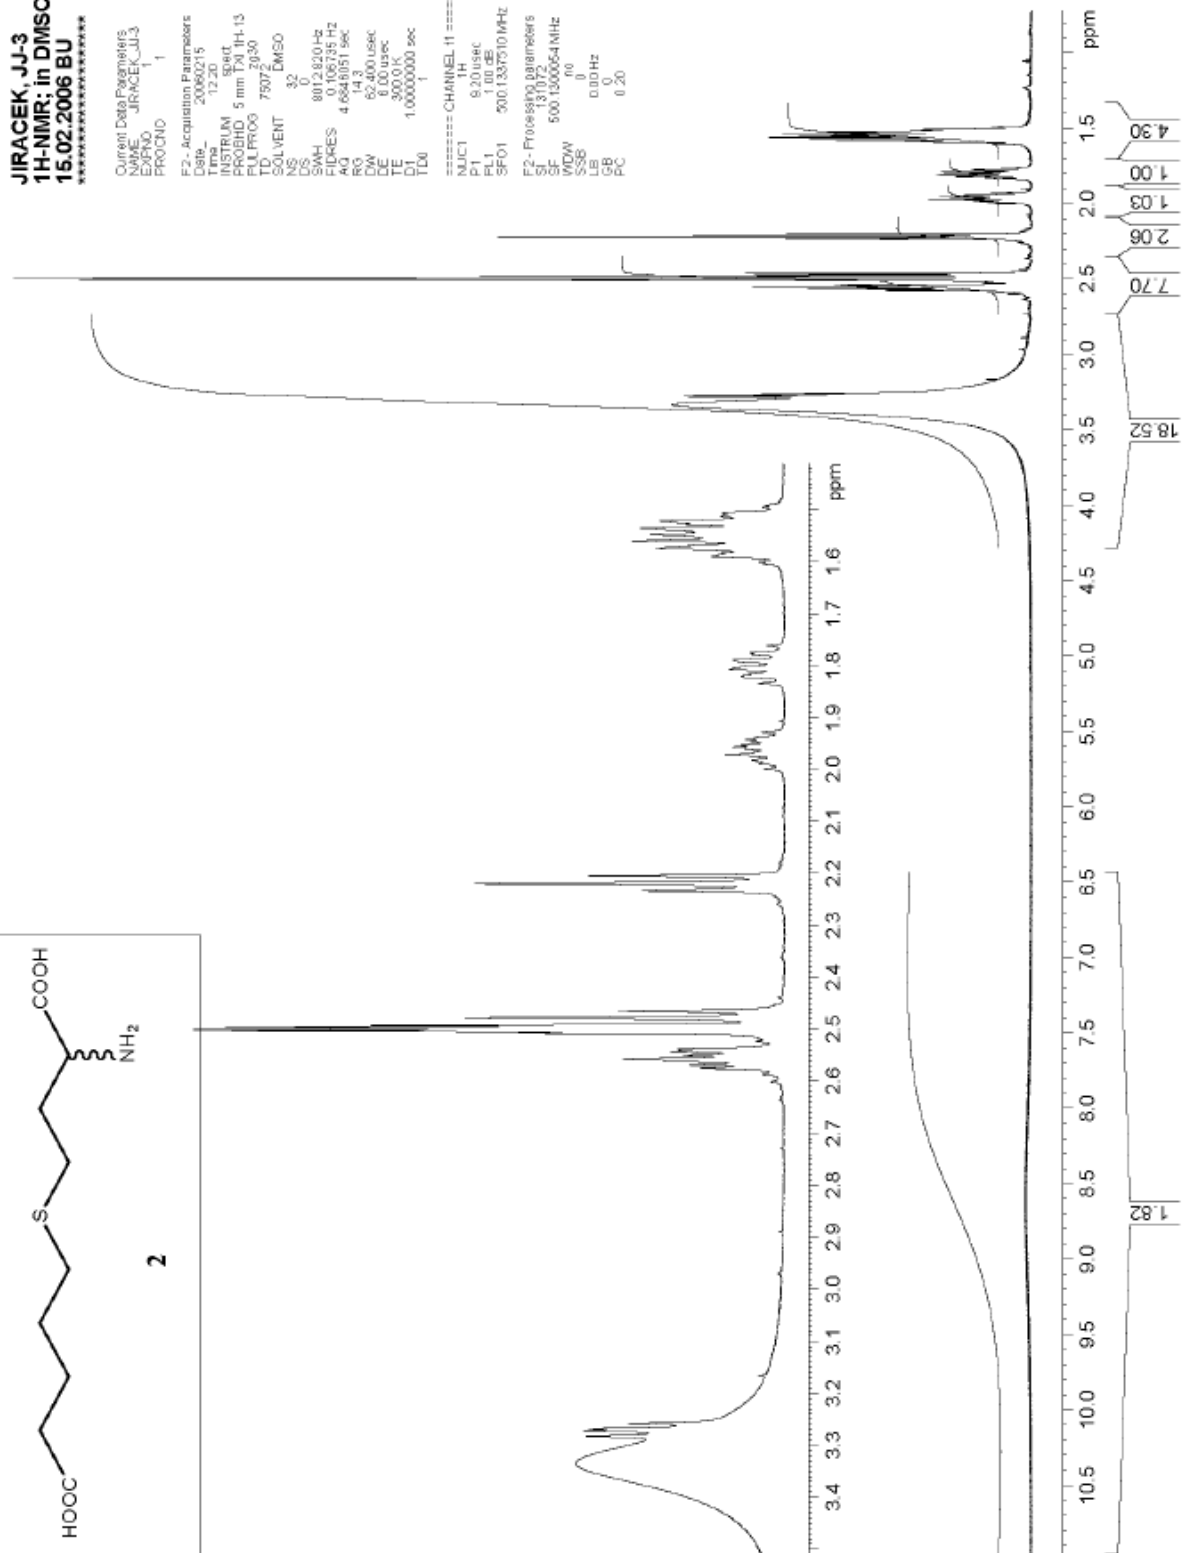

JIRACEK, JJ-3  
 13C-NMR, 1H-dec; in DMSO  
 15.02.2006 BU

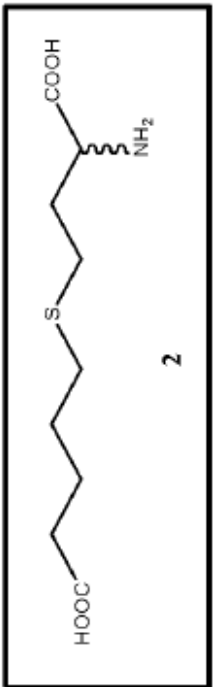

Current Data Parameters  
 Name: JIRACEK\_JJ-3  
 ExpNo: 5  
 PROCNO: 1

F2 - Acquisition Parameters  
 Date\_: 20060215  
 Time: 12.43  
 INSTRUM: spect  
 PROBNM: 5 mm 1H/1H-13  
 PULPROG: zgpg30  
 TO: 5555  
 SOLVENT: DMSO  
 NS: 1545  
 DS: 4  
 SWH: 27771.777 Hz  
 FIDRES: 0.500050 Hz  
 AQ: 0.9999880 sec  
 RG: 2.06425  
 DW: 16.000 usec  
 DE: 0.00000000  
 TE: 300.2 K  
 CNUC1: 13  
 CNUC2: 145.0000000  
 CNUC3: 1H  
 CNST1: 1.0000000  
 CNST2: 1.0000000  
 D1: 2.00000000 sec  
 D2: 0.00000000 sec  
 DELTA: 0.00001974 sec  
 ICG: 1

===== CHANNEL f1 =====  
 NUC1: 13C  
 P1: 16.50 usec  
 PL1: 0.00 dB  
 SFO1: 125.7703696 MHz

===== CHANNEL f2 =====  
 CPDPRG2: waltz16  
 NUC2: 1H  
 NUC3: 13C  
 PL2: 19.00 usec  
 PL3: 19.00 usec  
 PL4: 19.00 usec  
 PL12: 19.78 dB  
 SFO2: 500.1320005 MHz

F2 - Processing Parameters  
 SF: 131.072 MHz  
 SF2: 123.7576444 MHz  
 VWDW: EM  
 SSB: 0  
 LB: 0.50 Hz  
 GB: 0  
 PC: 0.25

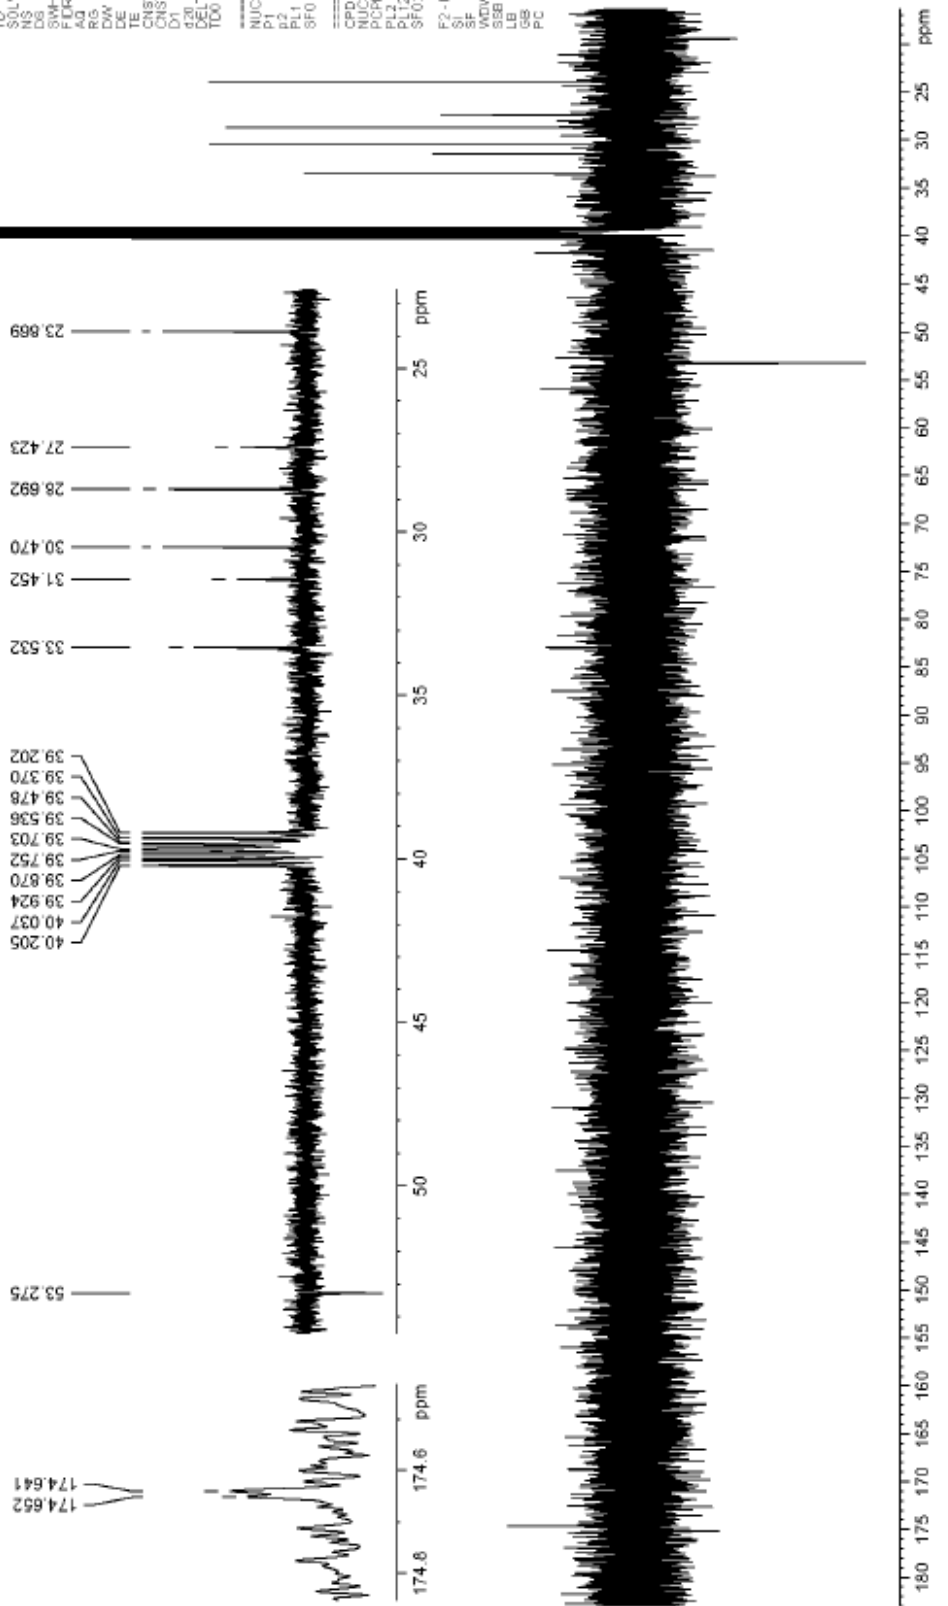

**JIRACEK, JJ-110**  
**<sup>1</sup>H-NMR: in DMSO**  
**11.04.2005 BU**

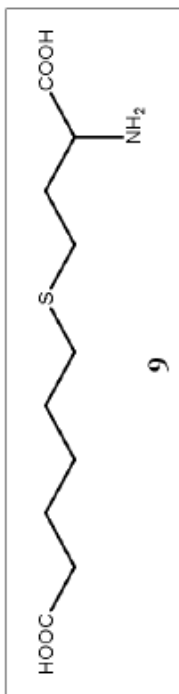

Current Data Parameters  
 NAME: JIRACEK\_JJ110  
 EXPNO: 1  
 PROCNO: 1  
 F2 - Acquisition Parameters  
 Date\_: 20050411  
 Time: 18.16  
 INSTRUM: spect  
 PULPROG: zgpg30  
 TD: 65536  
 SOLVENT: DMSO  
 NS: 51  
 DS: 4  
 SWH: 7507.607 Hz  
 AQ: 0.03000000 sec  
 FIDRES: 0.10000000 Hz  
 AQRES: 4.89491165 sec  
 RG: 143  
 DW: 66.800 usec  
 DE: 5.00 usec  
 TE: 300.2 K  
 D1: 1.00000000 sec  
 TD0: 1

===== CHANNEL f1 =====  
 NUC1: <sup>1</sup>H  
 P1: 9.20 usec  
 PL1: 1.00 dB  
 SFO1: 500.1330000 MHz  
 F2 - Processing Parameters  
 SI: 32768  
 SF: 500.1300000 MHz  
 WDW: r0  
 SSB: 0  
 LB: 0.00 Hz  
 GB: 0  
 PC: 0.20

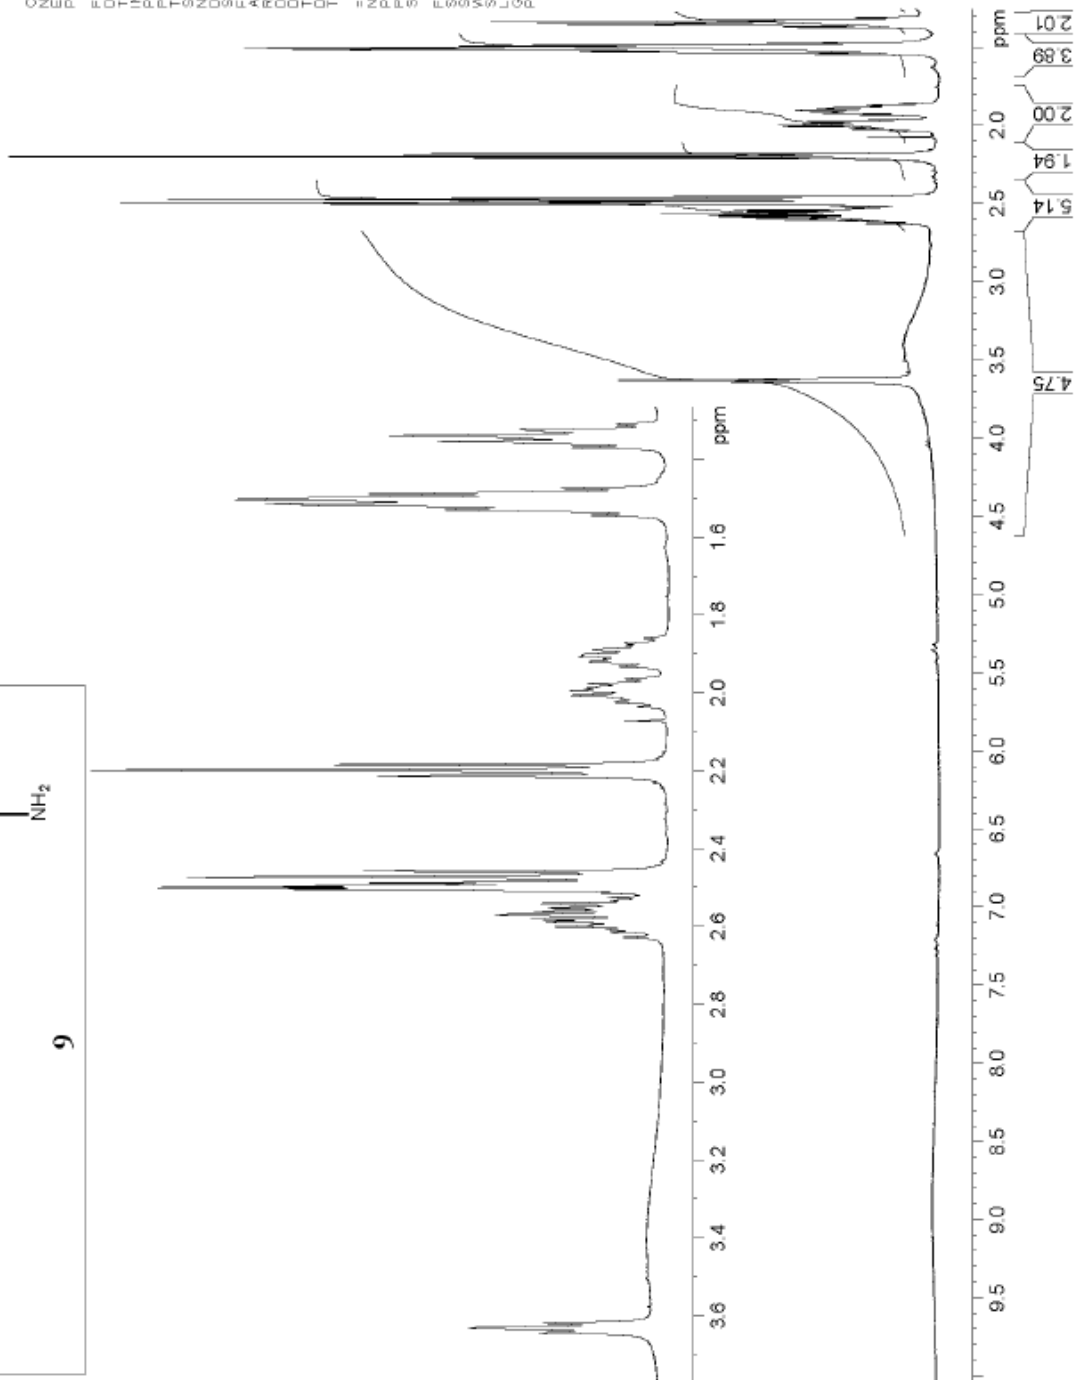

JIRACEK, JJ-110  
 13C-NMR, 1H-dec; in DMSO  
 11.04.2005 BU  
 \*\*\*\*\*

Current Data Parameters  
 NAME JIRACEK\_JJ-110  
 EXPNO 3  
 PROCNO 1

F2 - Acquisition Parameters  
 Date\_ 20050411  
 Time 19:02  
 INSTRUM spect  
 PROBHD 5 mm TXI 1H-13  
 TD 65536  
 TD0PRG2 mod  
 SOLVENT DMSO  
 NS 561  
 DS 4  
 SWH 27777.777 Hz  
 FIDRES 0.000001 Hz  
 AQ 0.000001 sec  
 RG 32843.5  
 DW 16.000 uSec  
 DE 6.00 uSec  
 TE 300.0 K  
 CRST2 145.000000  
 CRST1 145.000000  
 D1 1.0000000 sec  
 D11 0.0000000 sec  
 DELTA 0.00001974 sec  
 TE0 1

===== CHANNEL f1 =====  
 NUC1 13C  
 P1 15.50 uSec  
 K2 31.00 uSec  
 RF1 125.7703648 MHz  
 SFO1 500.1250000 MHz

===== CHANNEL f2 =====  
 CPDPRG2 waltz16  
 NUC2 1H  
 PCPD0 80.00 uSec  
 PL2 1.00 dB  
 PL12 19.79 dB  
 SFO2 500.1250000 MHz  
 F2 - Processing parameters  
 SI 32768  
 SF 125.7578237 MHz  
 WDW EM  
 GB 0  
 PC 0.20

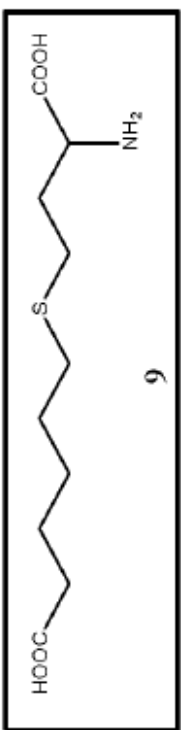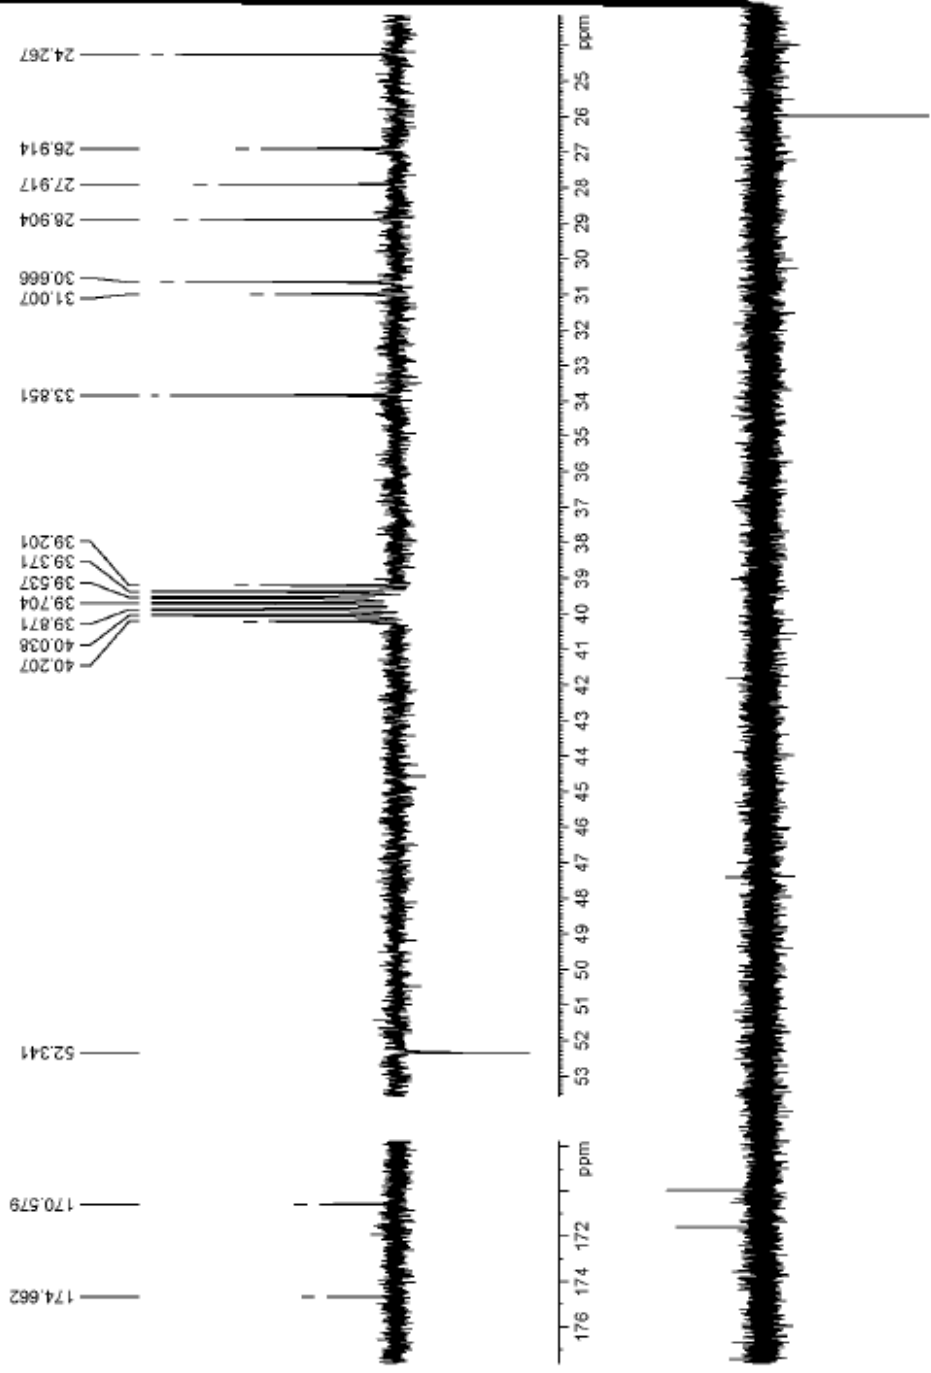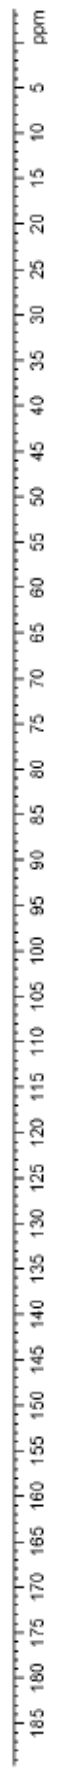

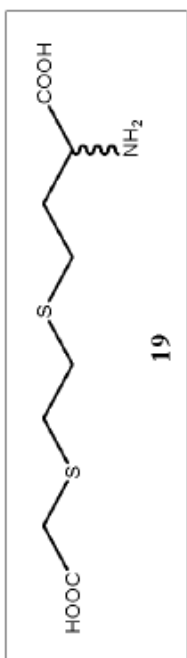

**JIRACEK, JJ-90**  
**1H-NMR: in DMSO**  
**15.02.2006 BU**

```

Current Data Parameters
NAME: JIRACEK_JJ-90
EXPNO: 1
PROCNO: 1
-----
F2 - Acquisition Parameters
Date_: 20060215
Time: 14.21
INSTRUM: spect
PROBHD: 5 mm 1H 1H-13
PULPROG: zgpg30
TD: 790720
SOLVENT: DMSO
NS: 19
DS: 4
SSA: 800.000000 Hz
FIDRES: 0.106395 Hz
AQ: 4.6849051 sec
RG: 14.3
CWA: 62.400 usec
TE: 300.2 K
DE: 3.0000000 sec
DI: 1.00000000 sec
-----
===== CHANNEL f1 =====
NUC1: 13C
P1: 9.20 usec
PL1: 1.00 dB
SFO1: 200.1337510 MHz
-----
F2 - Processing parameters
SI: 500.1300654 MHz
SF: 500.1300654 MHz
WDW: 0
SSB: 0
LB: 0.00 Hz
GB: 0
PC: 0.20
  
```

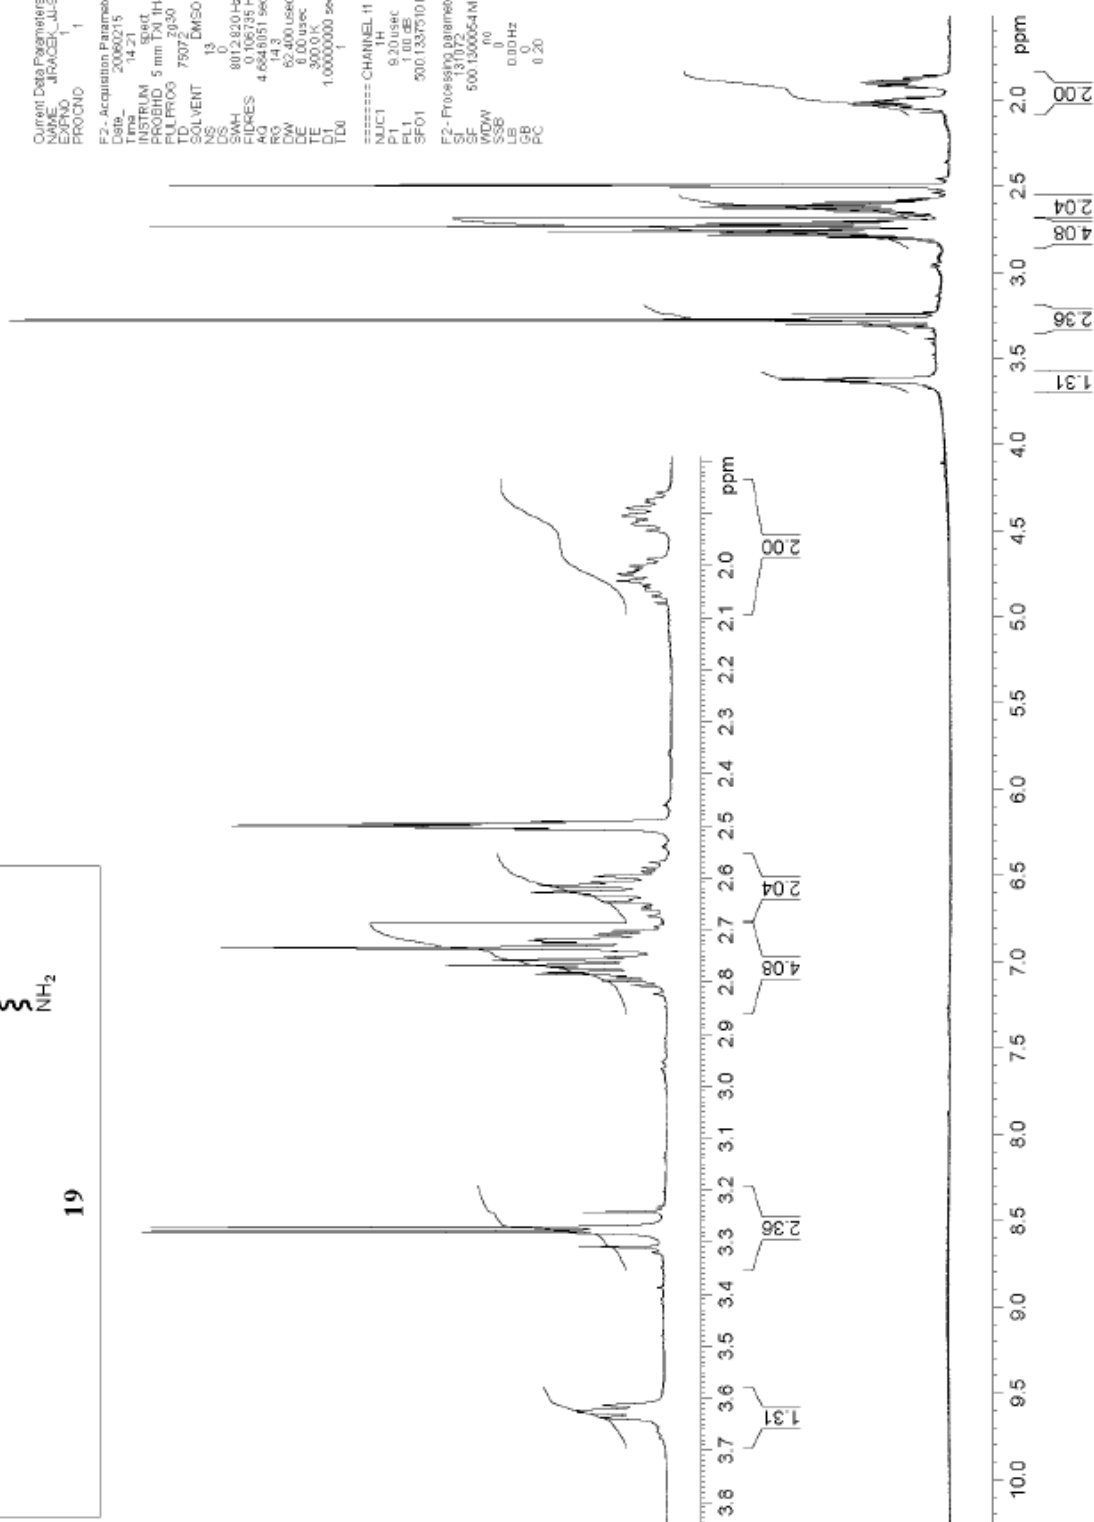



JIRACEK, JI-80  
 13C-NMR; 1H-dec; in DMSO  
 15.10.2004 BU  
 \*\*\*\*\*

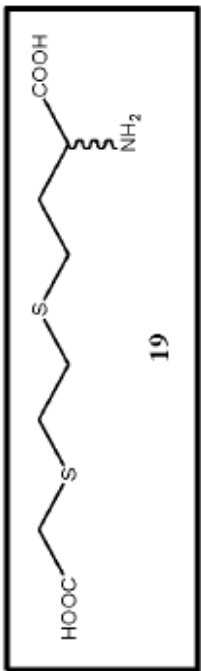

```

Current Data Parameters
NAME: JIRACEK_JI-80
EXPNO: 3
PROCNO: 1

F2 - Acquisition Parameters
Date_   : 20041015
Time    : 15:46
INSTRUM : spect
PROBHD  : 5 mm TXI 1H-13
PULPROG : jmod
TD      : 50720
SOLVENT : DMSO
DS      : 372
SS      : 2
SWH     : 25050.856 Hz
FIDRES  : 0.500053 Hz
AQ      : 0.9896539 sec
RG      : 32768
DE      : 19.00 usec
TE      : 300.0 K
CHST2   : 145.0000000
CHST1   : 1.0000000
D1      : 2.0000000 sec
d11     : 0.0000000 sec
DELTA   : 0.0000000 sec
TD0     : 1
===== CHANNEL f1 =====
NUC1    : 13C
P1      : 31.00 usec
PL1     : 0.00 dB
PL12    : 19.30 dB
SFO1    : 125.7634764 MHz

===== CHANNEL f2 =====
CPDPRG2 : waltz16
NUC2    : 13C
P2      : 80.00 usec
PL2     : 1.00 dB
PL12    : 19.78 dB
SFO2    : 900.1322007 MHz

C2 - Processing parameters
SF      : 125.7634764 MHz
WDW     : EM
SSB     : 0
LB      : 1.00 Hz
GB      : 0
PC      : 0.50
  
```

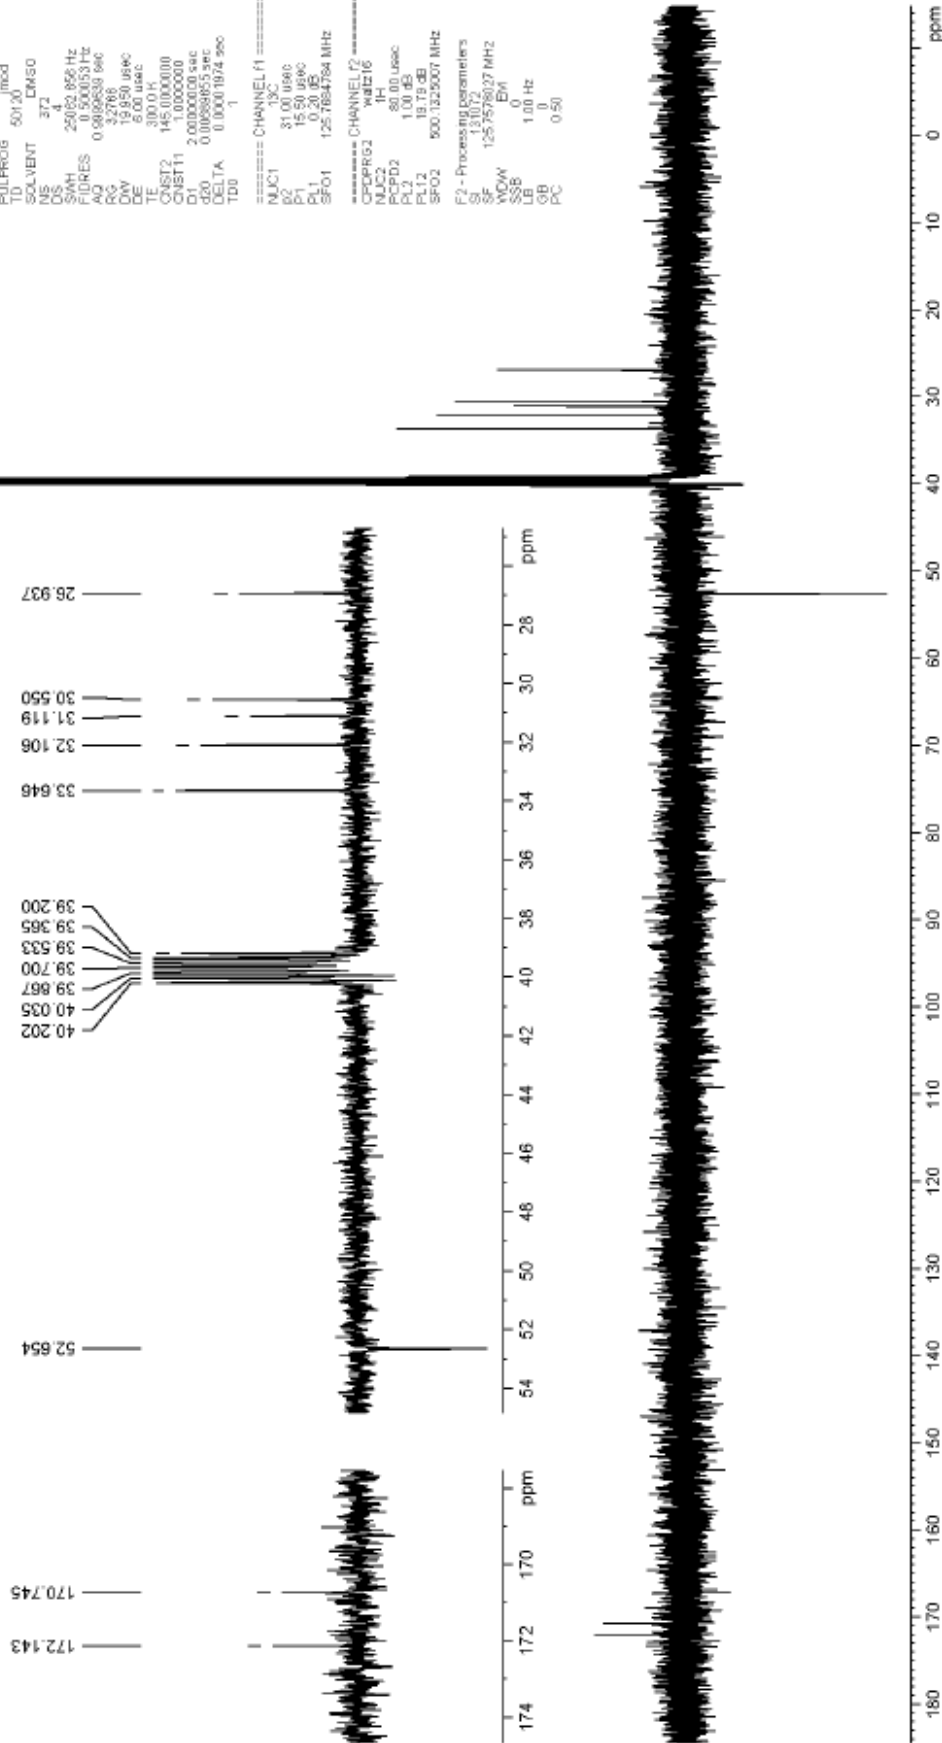

Supplement: NIHMS64095-supplement-1si20060302_10.pdf [file NIHMS64095-supplement-1si20060302_10.pdf]
